# Supplementary material
Source: publisher site journal article supplement (https://www.spandidos-publications.com/4966/downloadSupplementary)
Supplement: Supplementary file 1 [file downloadSupplementary]

## Sheet: Sheet1
Table SII. RNA sequencing [HEC-1B (WT, GPM6B-KO, GPM6B-KO + hGPM6B)].
	WT	GPM6B-KO	GPM6B-KO+hGPM6B	WT	GPM6B-KO	GPM6B-KO+hGPM6B	GPM6B-KO vs WT	GPM6B-KO+hGPM6B vs WT	GPM6B-KO vs GPM6B-KO+hGPM6B
gene name	Processed log2	Processed log2	Processed log2	Normalized FPKM	Normalized FPKM	Normalized FPKM	Fold Change	Fold Change	Fold Change
GPM6B	-1.01537	-2.91949	3.93486	0.374279	0.0657288	11.5708	-3.74279	30.9149	-115.708
ALDH1A1	0.671817	-0.717556	0.0457385	82.9032	31.6467	53.7159	-2.61965	-1.54336	-1.69736
